# Supplementary material
Source: PubMed Central journal article supplement (PMC5966324)
Supplement: NIHMS956128-supplement-supplementary_file_1.pdf [file NIHMS956128-supplement-supplementary_file_1.pdf]

Online Supplement Table 1. Comparison of low income and high income neighborhood variables dichotomized at 2011 national median income (NMI) of 50054.

| <b>Characteristic</b>                                                  | <b>Below NMI<br/>(N=12)</b> | <b>Above NMI<br/>(N=43)</b> | <b>p-value</b> |
|------------------------------------------------------------------------|-----------------------------|-----------------------------|----------------|
| <b>Neighborhood Demographics†</b>                                      |                             |                             |                |
| Median Household Income (US Dollars)                                   | 33260<br>(28460, 38310)     | 65900<br>(54280, 7330)      | <0.001         |
| African Americans (%)                                                  | 87.1<br>(51.7, 94.9)        | 16.3<br>(7.9, 54.4)         | <0.001         |
| Whites (%)                                                             | 10.2<br>(2.8, 38.3)         | 75.1<br>(40.8, 80.0)        | <0.001         |
| Residents 25 years or older with a bachelor degree or more (%)         | 14.0<br>(7.5, 21.0)         | 54.5<br>(30.5, 68.3)        | <0.001         |
| Percentage of population >65 years of age (%)                          | 12.0<br>(9.0, 13.0)         | 11.0<br>(10.8, 13.8)        | 0.57           |
| <b>Neighborhood Store Densities</b>                                    |                             |                             |                |
| Tobacco store (density per 10,000 residents)                           | 27.0<br>(16.5, 40.5)        | 10.5<br>(7.2, 19.9)         | 0.01           |
| Alcohol store (density per 10,000 residents)                           | 4.9<br>(2.5, 6.9)           | 3.0<br>(2.2, 3.7)           | 0.04           |
| Fast Food Density (per 10,000 residents)                               | 1.3<br>(0.0, 3.2)           | 1.6<br>(0.6, 2.9)           | 0.38           |
| <b>Neighborhood Health Outcomes</b>                                    |                             |                             |                |
| Life expectancy at birth (years)                                       | 70.7<br>(66.9, 72.6)        | 76.5<br>(74.3, 79.8)        | <0.001         |
| Aged-adjusted mortality (per 10,000 residents)                         | 119.0<br>(108.2, 138.4)     | 102.1<br>(87.3, 118.4)      | <0.001         |
| Deaths due to chronic lower respiratory disease (per 10,000 residents) | 3.8<br>(3.0, 5.7)           | 3.2<br>(2.3, 5.4)           | 0.34           |

Results are presented as median (25<sup>th</sup>, 75<sup>th</sup> percentiles).

†Note that we only included African American and white for race, as other races made up less than 1% of the majority of the neighborhoods.
