# Supplementary material
Source: PubMed Central journal article supplement (PMC5966324)
Supplement: NIHMS956128-supplement-supplementary_file_2.pdf [file NIHMS956128-supplement-supplementary_file_2.pdf]

Online Supplement Table 2. Comparison of neighborhoods with less than 20% poverty (<20% Poverty) and neighborhoods with poverty of 20% or greater ( $\geq$ 20% Poverty).

| Characteristic                                                         | $\geq$ 20% Poverty<br>(N=17) | <20%<br>(N=38)          | p-value |
|------------------------------------------------------------------------|------------------------------|-------------------------|---------|
| <b>Neighborhood Demographics†</b>                                      |                              |                         |         |
| Median Household Income (US Dollars)                                   | 27820<br>(20660, 30870)      | 39930<br>(33980, 51710) | <0.001  |
| African Americans (%)                                                  | 89.1<br>(69.2, 95.0)         | 63.4<br>(7.9, 54.4)     | 0.04    |
| Whites (%)                                                             | 5.8<br>(2.7, 23.5)           | 29.4<br>(7.8, 71.1)     | 0.04    |
| Residents 25 years or older with a bachelor degree or more (%)         | 7.5<br>(6.8, 17.3)           | 22.0<br>(14.0, 44.5)    | 0.002   |
| Percentage of population >65 years of age (%)                          | 10.1<br>(8.0, 13.0)          | 12.0<br>(9.0, 15.5)     | 0.16    |
| <b>Neighborhood Store Densities</b>                                    |                              |                         |         |
| Tobacco store (density per 10,000 residents)                           | 38.0<br>(26.7, 50.3)         | 17.60<br>(9.1, 29.8)    | <0.001  |
| Alcohol store (density per 10,000 residents)                           | 6.1<br>(5.0, 7.9)            | 3.0<br>(2.2, 5.1)       | <0.001  |
| Fast Food Density (per 10,000 residents)                               | 1.1<br>(0.0, 2.6)            | 1.6<br>(0.4, 3.2)       | 0.47    |
| <b>Neighborhood Health Outcomes</b>                                    |                              |                         |         |
| Life expectancy at birth (years)                                       | 66.9<br>(65.2, 68.9)         | 72.9<br>(71.0, 75.3)    | <0.001  |
| Aged-adjusted mortality (per 10,000 residents)                         | 137.4<br>(129.2, 148.8)      | 107.3<br>(91.7, 118.8)  | <0.001  |
| Deaths due to chronic lower respiratory disease (per 10,000 residents) | 4.4<br>(3.3, 5.9)            | 3.5<br>(2.7, 5.3)       | 0.31    |

Results are presented as median (25<sup>th</sup>, 75<sup>th</sup> percentiles).

†Note that we only included African American and white for race, as other races made up less than 1% of the majority of the neighborhoods.
